# Supplementary material for: Optimized Isolation and Characterization of C57BL/6 Mouse Hepatic Stellate Cells
Source: MDPI journal article supplement (doi:10.3390/cells11091379), 2022-04-19

**Figure S3.** (A-B) CD38 expression on HSC after 24 h adherence on plastic plates analyzed by flow cytometry using PE CY7-conjugated isotype (A) or anti-mouse CD38 (B) over side scatter. CD38+ cells accounted for 83.7% of viable cells whereas autofluorescent+ (violet) and CD45+ (blue) cells accounted for respectively 8.6% and 5.7%. Overall purity of the preparation was of 92.3% SSC: side scatter, FSC: forward scatter. n=1; (B-C) CD38 expression after incubation with isotype control (B) and antibody (B) and backgating for identified populations. Blue: CD45+ cells, violet: autofluorescence+ cells, gray: CD45-/autofluorescence- cells. n=3.

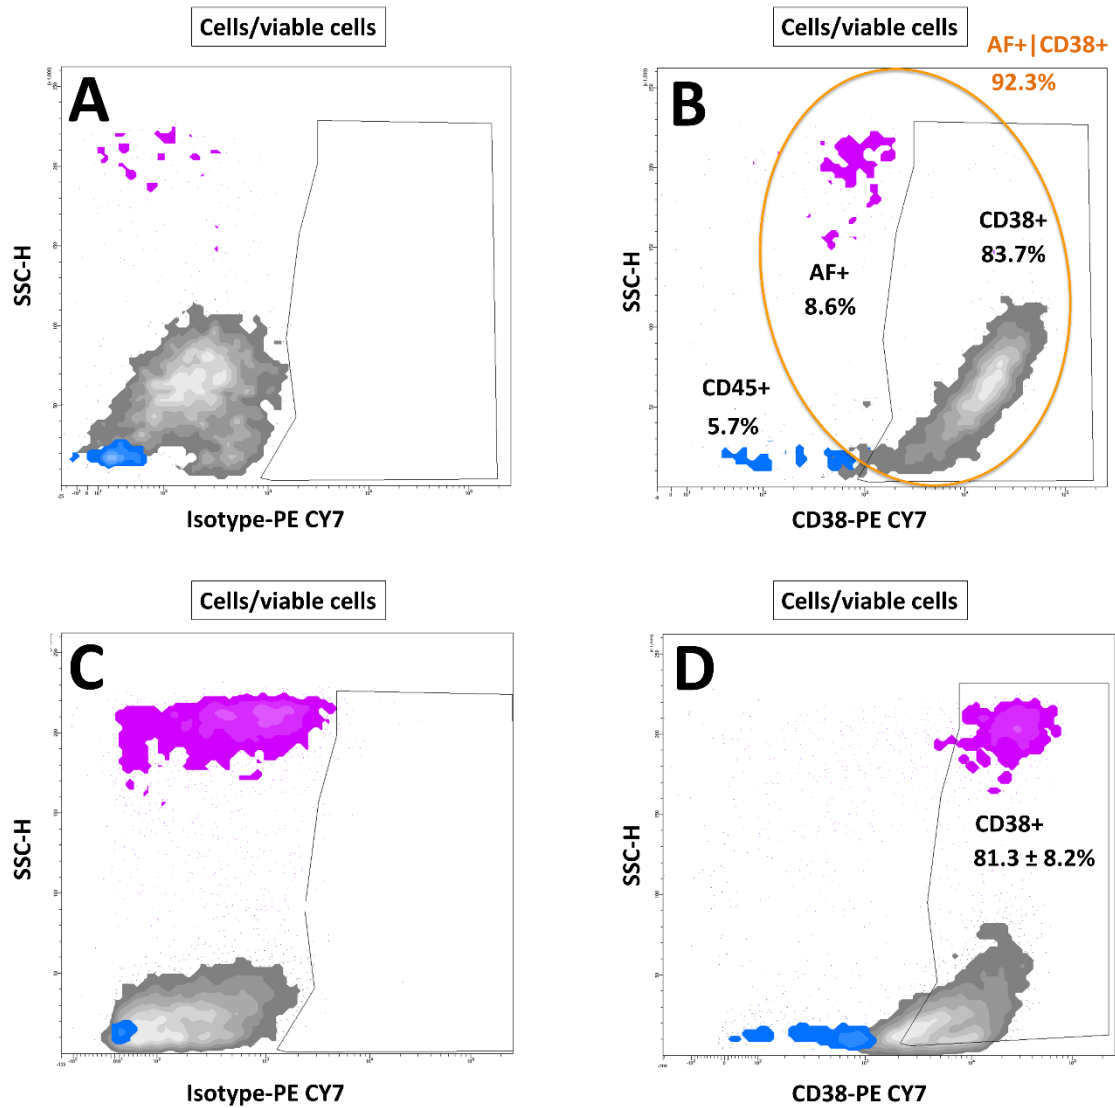

Supplement: s1 [file s1]
