# Supplementary material for: Optimized Isolation and Characterization of C57BL/6 Mouse Hepatic Stellate Cells
Source: MDPI journal article supplement (doi:10.3390/cells11091379), 2022-04-19

**Figure S2.** Hepatic stellate cell activation. Expression of  $\alpha$ -smooth muscle (in red, nucleus in blue) after incubation with TGF- $\beta$  is characteristic of HSC activation and differentiation in myofibroblast.

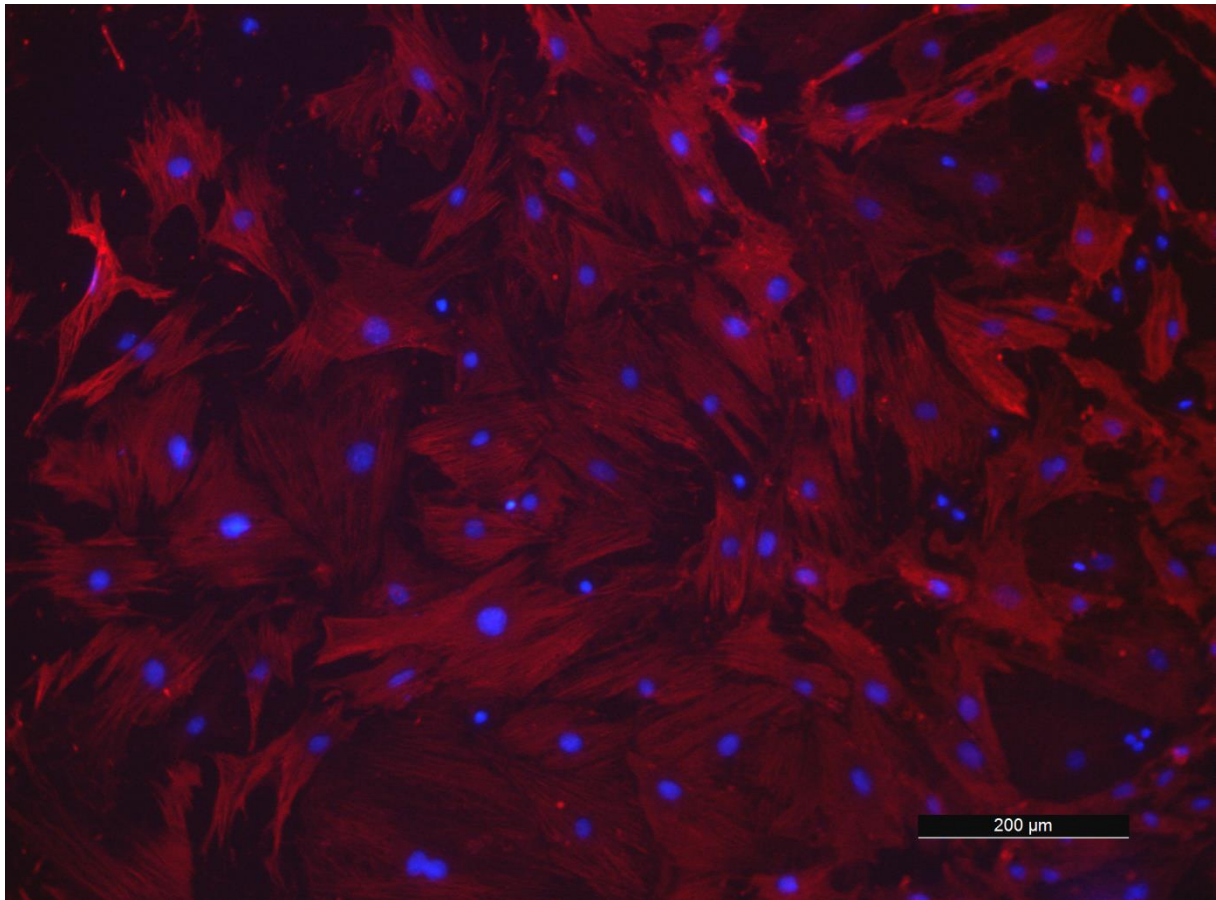

Supplement: s1 [file s1]
