# Supplementary material for: Optimized Isolation and Characterization of C57BL/6 Mouse Hepatic Stellate Cells
Source: MDPI journal article supplement (doi:10.3390/cells11091379), 2022-04-19

**Figure S1.** Isolated HSC characterization with light microscopy and fluorescence microscopy. (A) After 12 hours of cultured and at high magnification, HSC cytoplasm structure showed numerous cytoplasmic lipid droplets (arrows); (B) Immunofluorescence staining for F4/80 of cell preparations after MACS sorting: retained CD11b+ cells (Kupffer cells) or flow through CD11b- cells (HSC). Blue: Hoechst, green: F4/80. White arrow: a unique macrophage contaminating the HSC preparation; (C and D): Oil Red O staining of HSC droplets confirming their lipid nature. Yellow bar: 50  $\mu$ m, white bar: 200  $\mu$ m.

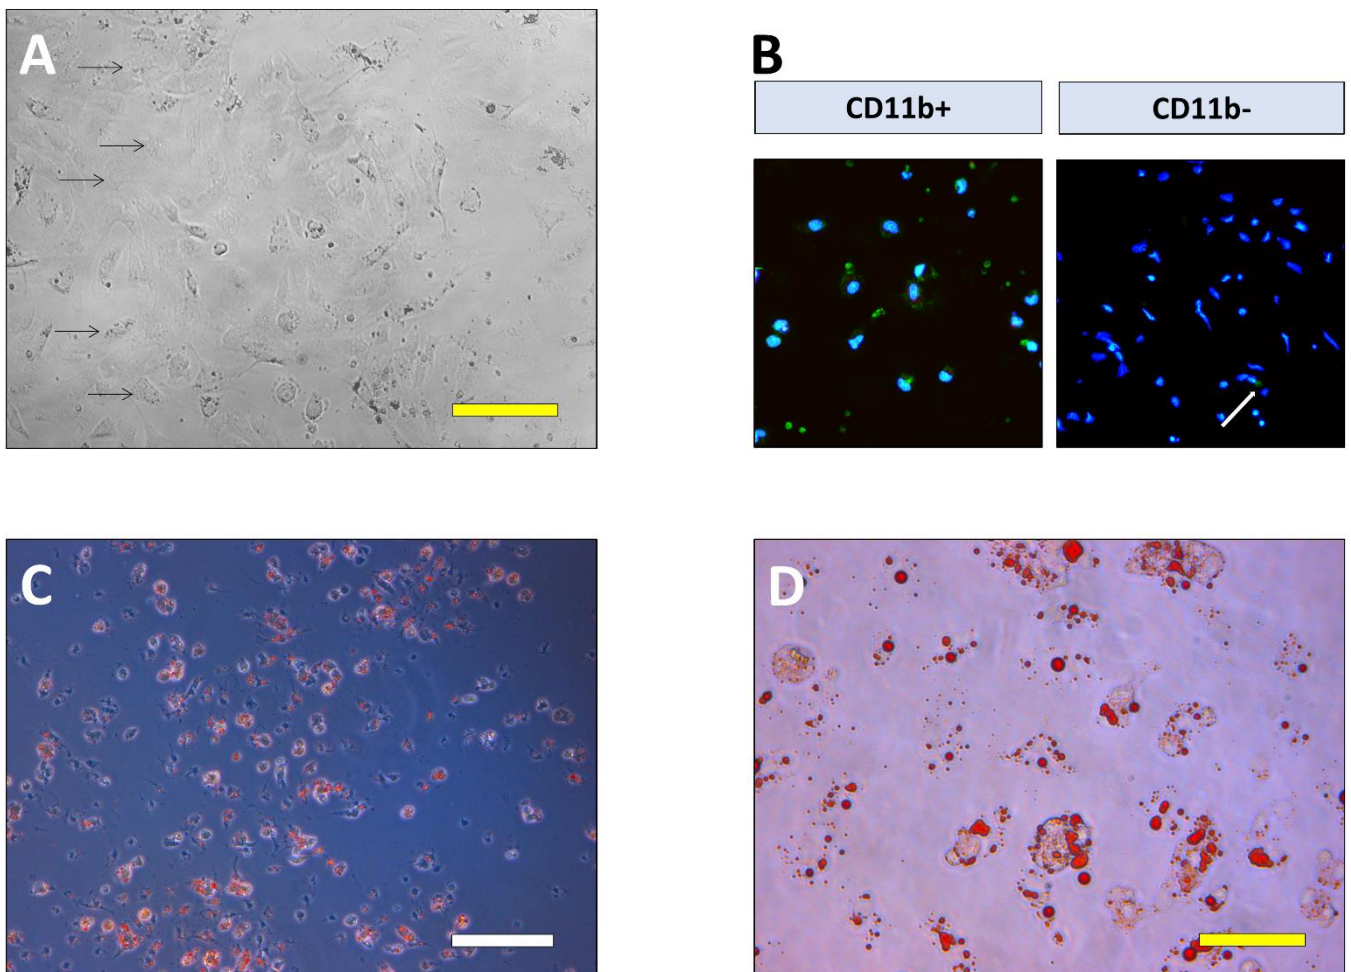

Supplement: s1 [file s1]
