# Supplementary material for: Optimized Isolation and Characterization of C57BL/6 Mouse Hepatic Stellate Cells
Source: MDPI journal article supplement (doi:10.3390/cells11091379), 2022-04-19
Supplement: s1 [file s1]

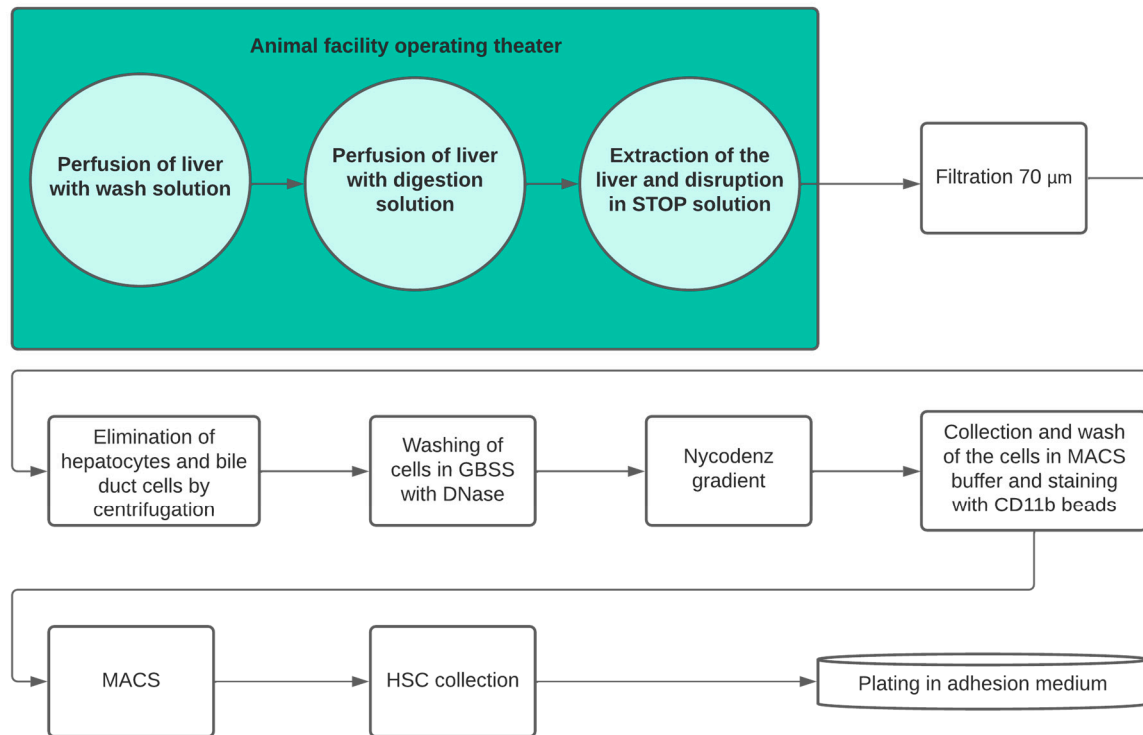

**Figure S4.** Flowchart of the HSC isolation protocol. MACS: magnetic-activated cell sorting, FACS: fluorescence-activated cell sorting
